# Supplementary material
Source: publisher figshare collection journal article supplement (https://acs.figshare.com/ndownloader/files/8011273)
Supplement: Supplementary file 1 [file 8011273]

## Supporting Information

### **A Journey Along the Extruder with Polystyrene:C<sub>60</sub> Nanocomposites: Effect of Feeding Formulation on Dispersion and Re-Agglomeration Phenomena**

Hugo Gaspar<sup>1</sup>, Paulo Teixeira<sup>1</sup>, Raquel Santos<sup>1</sup>, Liliana Fernandes<sup>1</sup>, Loic Hilliou<sup>1</sup>, Michael P. Weir<sup>2</sup>, Andrew J. Parnell<sup>2</sup>, Kerry J. Abrams<sup>3</sup>, Christopher J. Hill<sup>4</sup>, Wim G. Bouwman<sup>5</sup>, Steven R. Parnell<sup>5</sup>, Stephen M. King<sup>6</sup>, Nigel Clarke<sup>2</sup>, José A. Covas<sup>1,\*</sup>, Gabriel Bernardo<sup>1,\*</sup>

<sup>1</sup>Institute for Polymers and Composites/I3N, University of Minho, 4800-058 Guimarães, Portugal

<sup>2</sup>Department of Physics and Astronomy, The University of Sheffield, Sheffield S3 7RH, United Kingdom

<sup>3</sup>Department of Materials Science and Engineering, The University of Sheffield, Sheffield S1 3JD, United Kingdom

<sup>4</sup>Department of Biomedical Science, The University of Sheffield, Sheffield S3 7HF, United Kingdom

<sup>5</sup>Faculty of Applied Sciences, Delft University of Technology, Mekelweg 15, 2629 JB Delft, Netherlands

<sup>6</sup>ISIS Pulsed Neutron Source, STFC Rutherford Appleton Laboratory, Harwell Campus, Didcot, OX11 0QX, United Kingdom

**(a)**

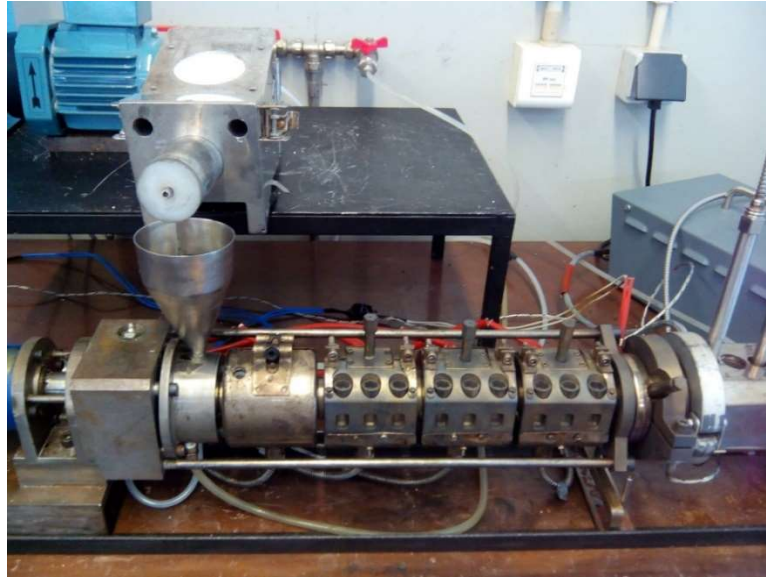

**(b)**

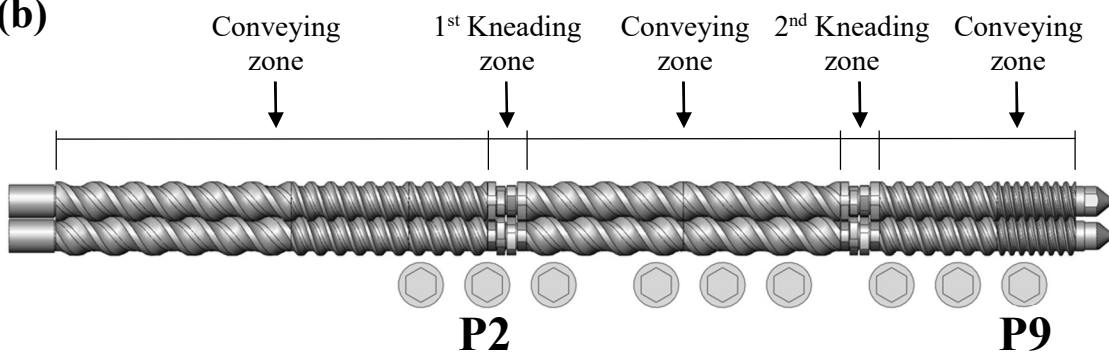

**Figure S.I.1.** (a) Prototype twin-screw extruder with sampling ports and volumetric feeder; (b) geometry of the screws and identification of the sampling locations P2 and P9.

| (a)                 | Initial                                                                            | P2                                                                                 | P9                                                                                  | Ribbon                                                                               |
|---------------------|------------------------------------------------------------------------------------|------------------------------------------------------------------------------------|-------------------------------------------------------------------------------------|--------------------------------------------------------------------------------------|
|                     | 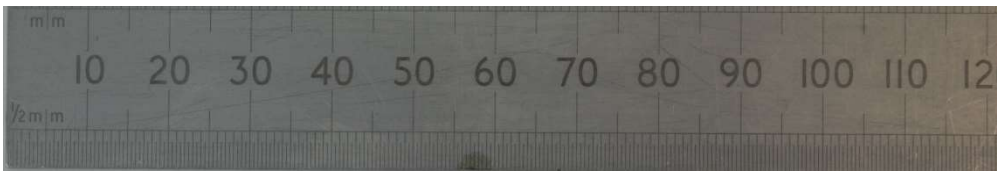 |                                                                                    |                                                                                     |                                                                                      |
| Mixed Powders       |   |   |   |   |
| Pre-Solvent Blended |  |  |  |  |

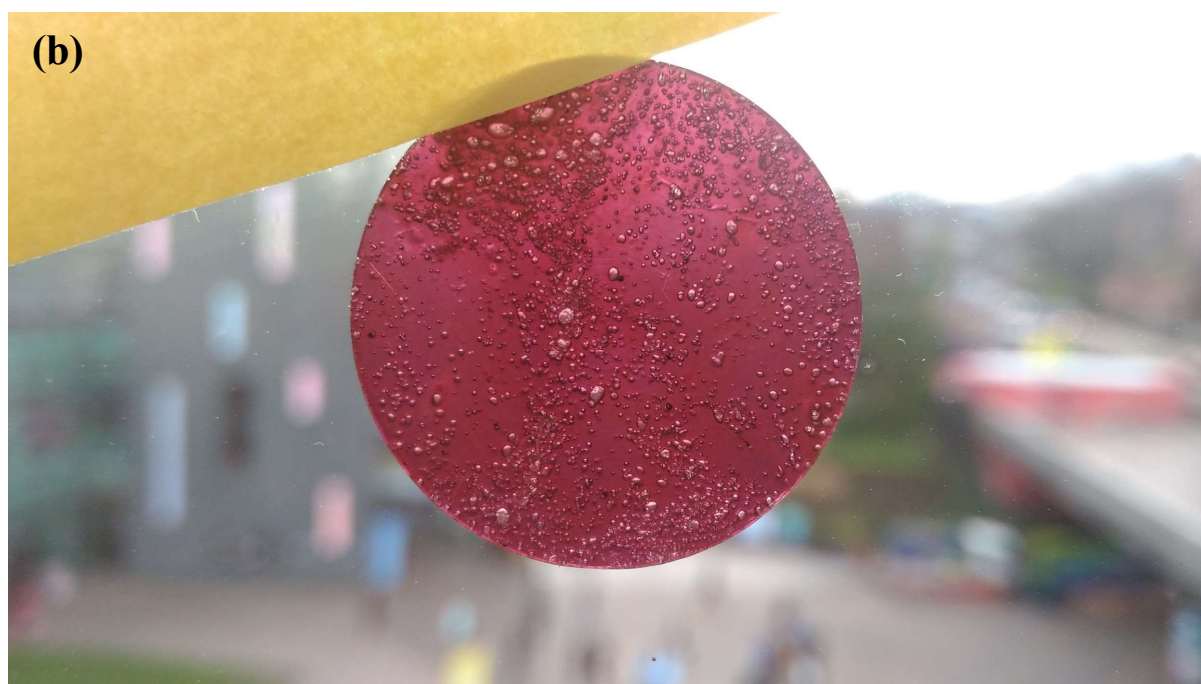

**Figure S.I.2.** (a) Close-up photo of the experimental samples, namely: compression moulded samples of the initial feeding formulations; extruded samples P2; extruded samples P9 and extruded ribbons. A ruler is also shown to indicate the real dimension of the samples.; (b) Close-up photo of the pre-solvent blended initial sample (compression molded at 170 °C), lit from the back to highlight its purple colour.

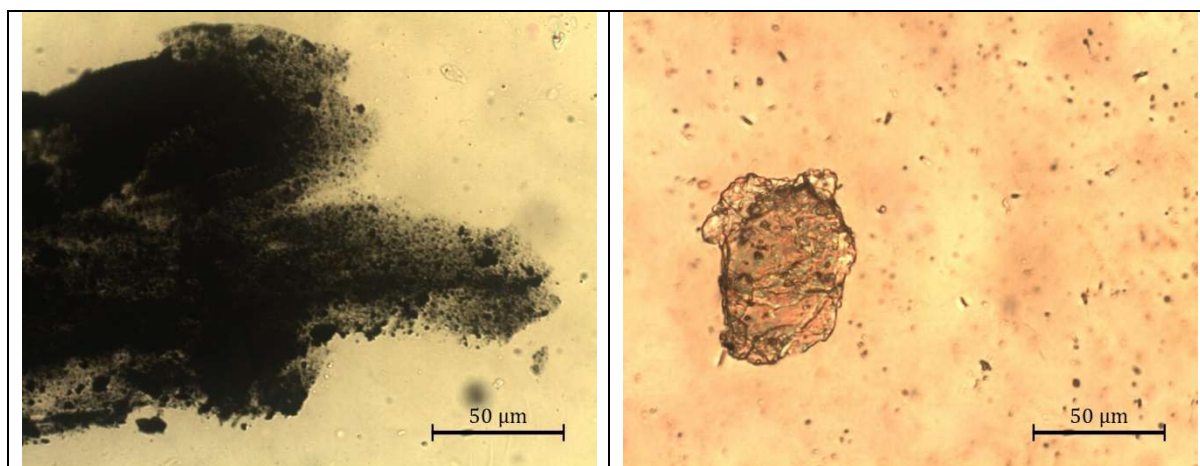

**Figure S.I.3.** Optical microscopy images of the initial feeding formulations: (left) mixed powders; (right) solvent blended composite. For obtaining these microscopy images, the initial feeding formulations (in powder form) were softened at 160 °C and spread onto a glass slide. The larger, approximately circular, feature with ~50  $\mu\text{m}$  diameter in the image on the right corresponds to material that did not melt during the preparation of the optical microscopy sample.

(a)

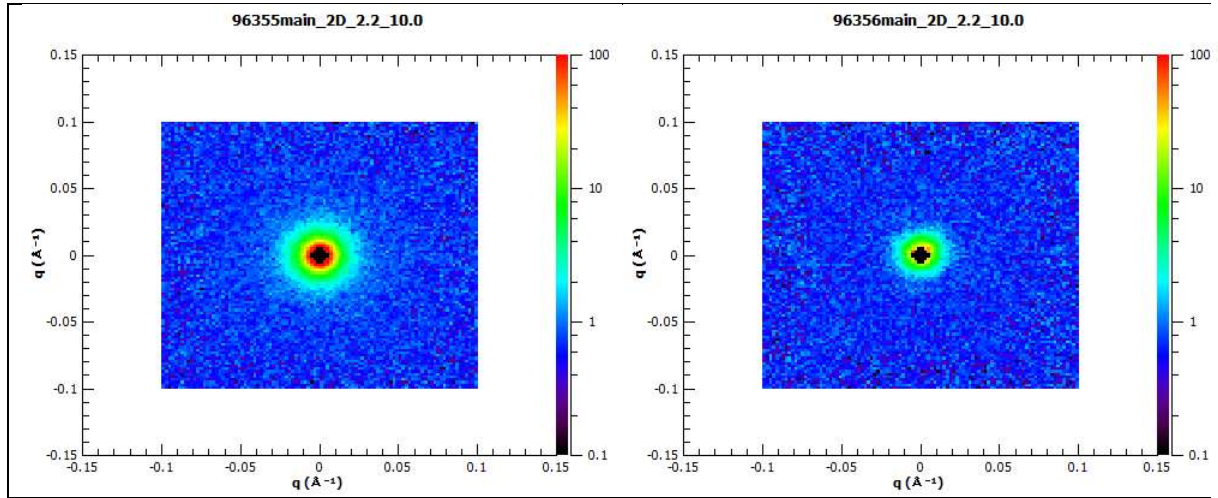

(b)

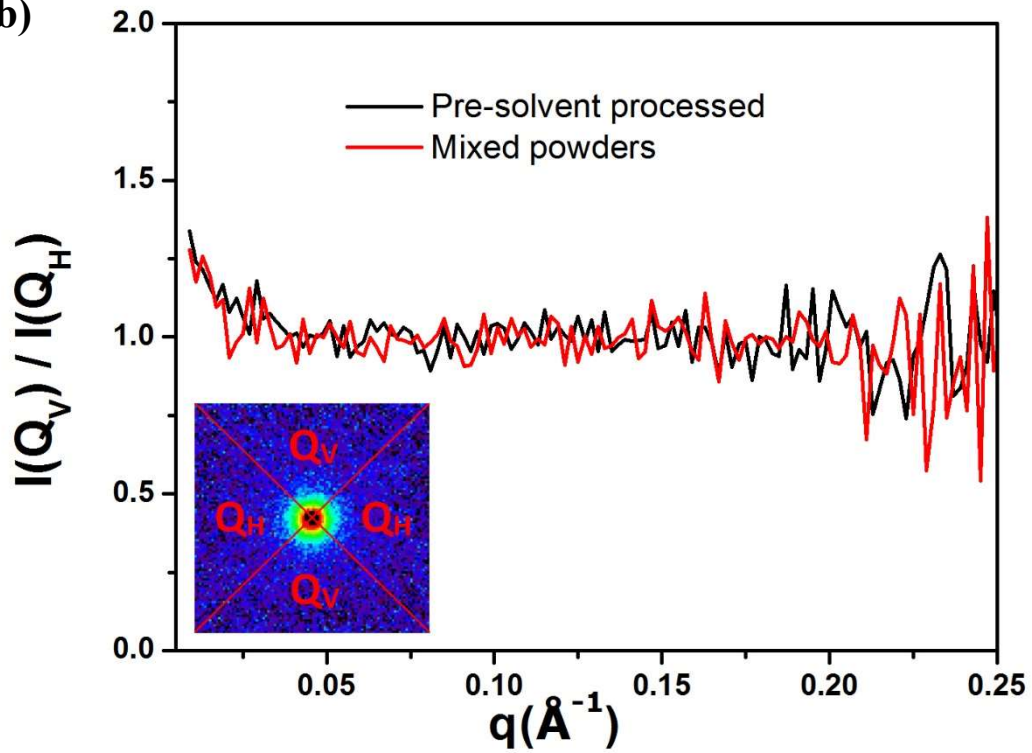

**Figure S.I.4.** (a) Neutron scattering 2D patterns of extruded ribbons processed from a pre-solvent blend (left) and from mixed powders (right); (b) Intensity ratio  $I(Q_V)/I(Q_H)$  as a function of  $q$ , for the vertical and horizontal quadrants of the 2D scattering patterns (see inset). The average ratio is  $\sim 1$  which means that the samples are completely isotropic.



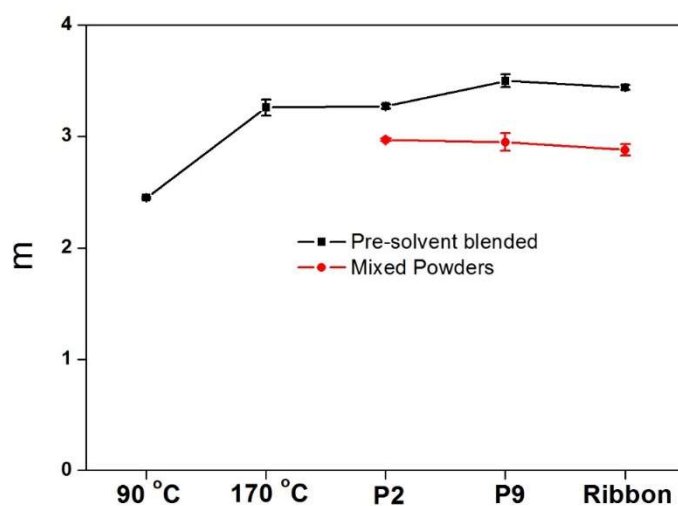

**Figure S.I.5.** Variation of the slope of the SAXS curves with processing. For ease of comparison the scale used is identical to the scale in Figure 5.

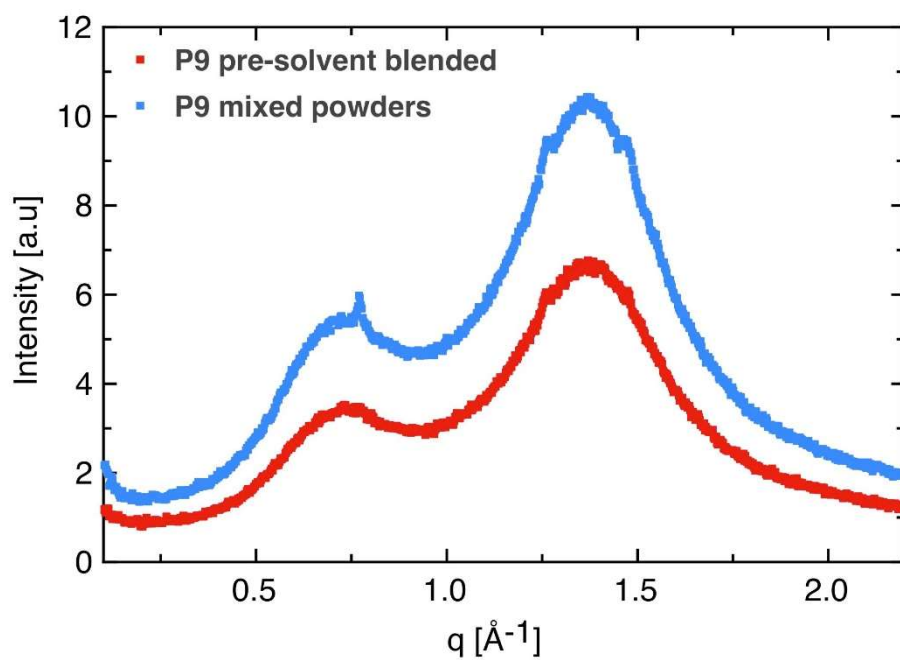

**Figure S.I.6.** 1D WAXS patterns of samples collected from sampling port #9. The data has been translated vertically for clarity.

**Experimental Procedure for the TEM characterization**

Samples were snap frozen in Liquid Nitrogen and placed in the FC6 cryo-chamber to equilibrate for approximately 30 minutes. Ultrathin sections, approximately 90-100nm thick, were cut using a Leica UC 6 ultra-microtome and FC6 cryobox attachment onto uncoated 200 mesh copper grids at temperatures of between -60 to -100 degrees C.

Sections were examined using a FEI Tecnai Transmission Electron Microscope at an accelerating voltage of 80 kV. Electron micrographs were recorded using a Gatan Orius 1000 digital camera and Gatan digital micrograph software.

**Experimental Procedure for the STEM characterization**

Sections on TEM grids were examined in FEI Helios UC SEM in Transmission Mode utilizing the STEM3++ detector with an accelerating voltage of 29 kV and a working distance of 5 mm. Images were processed in ImageJ 1.51j.

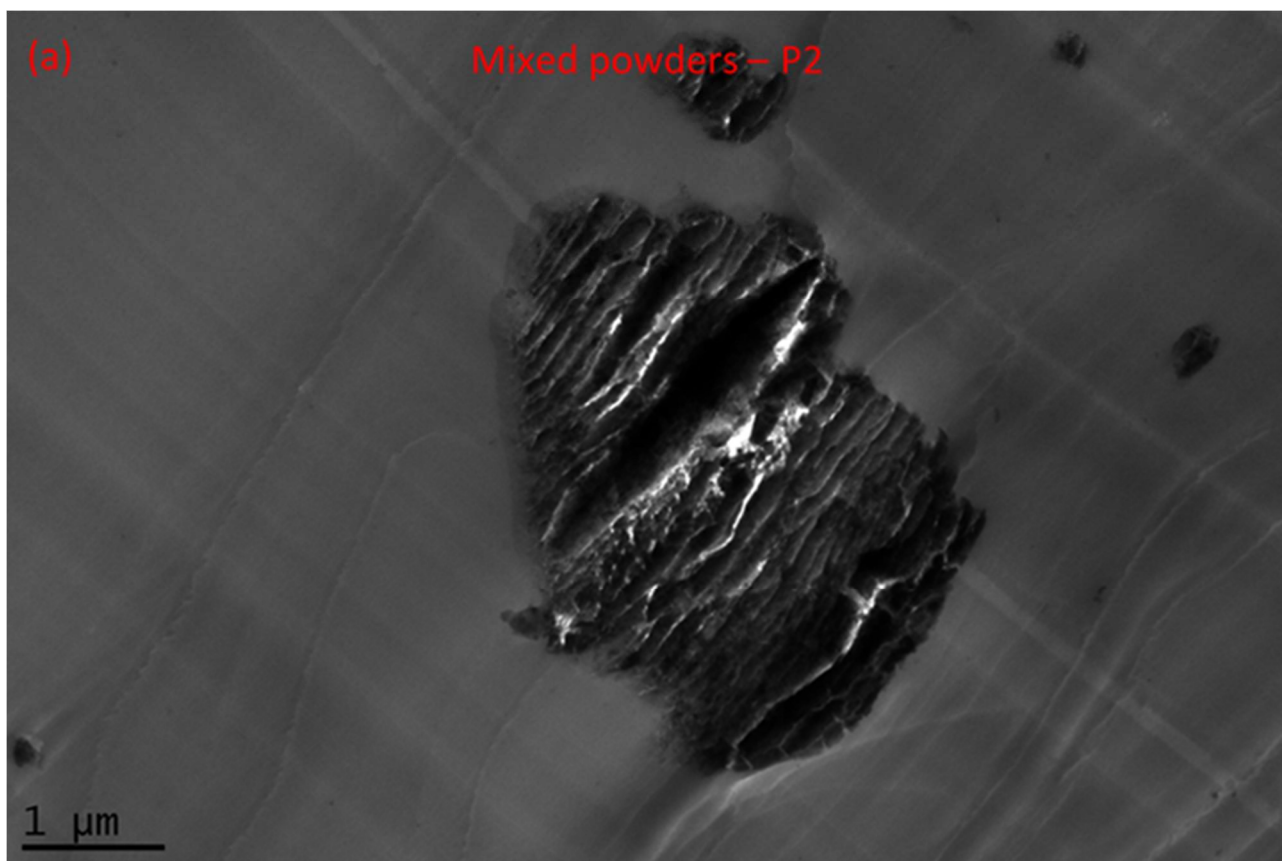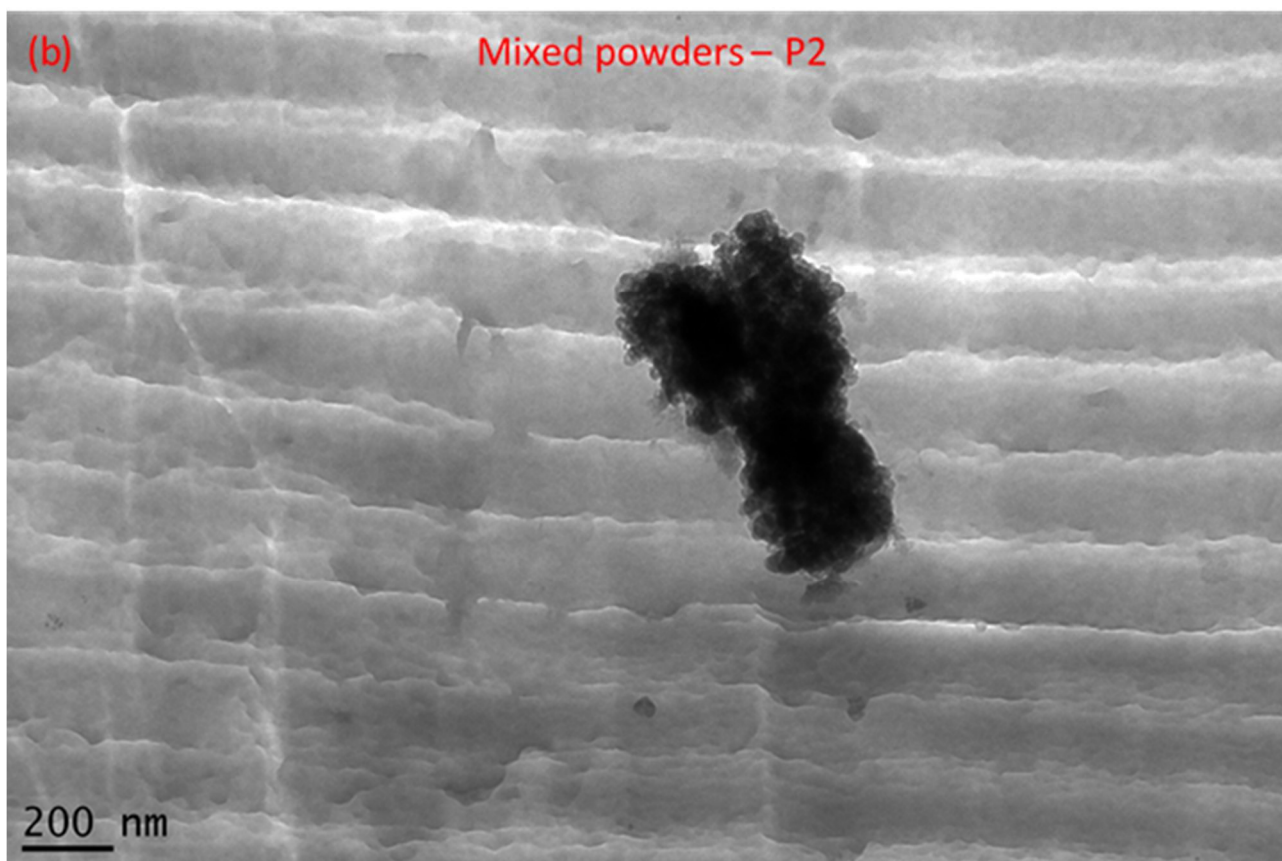



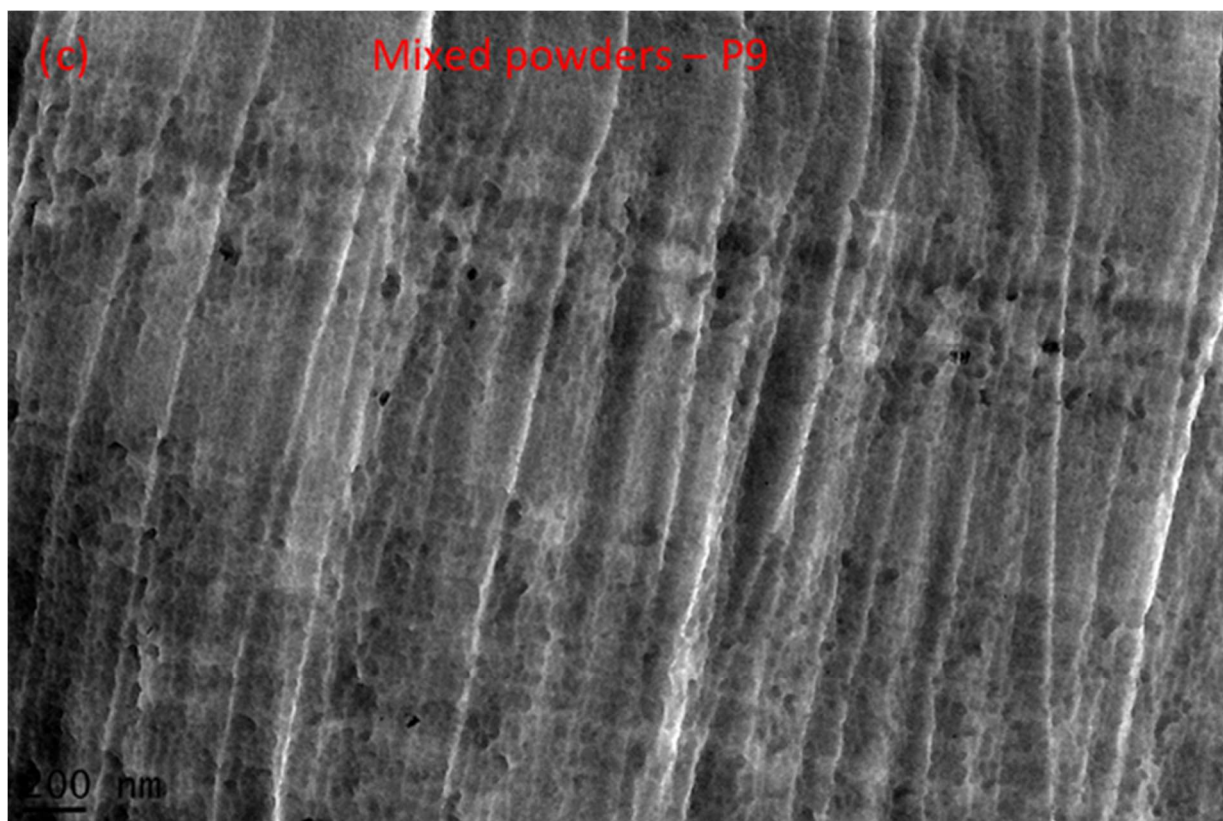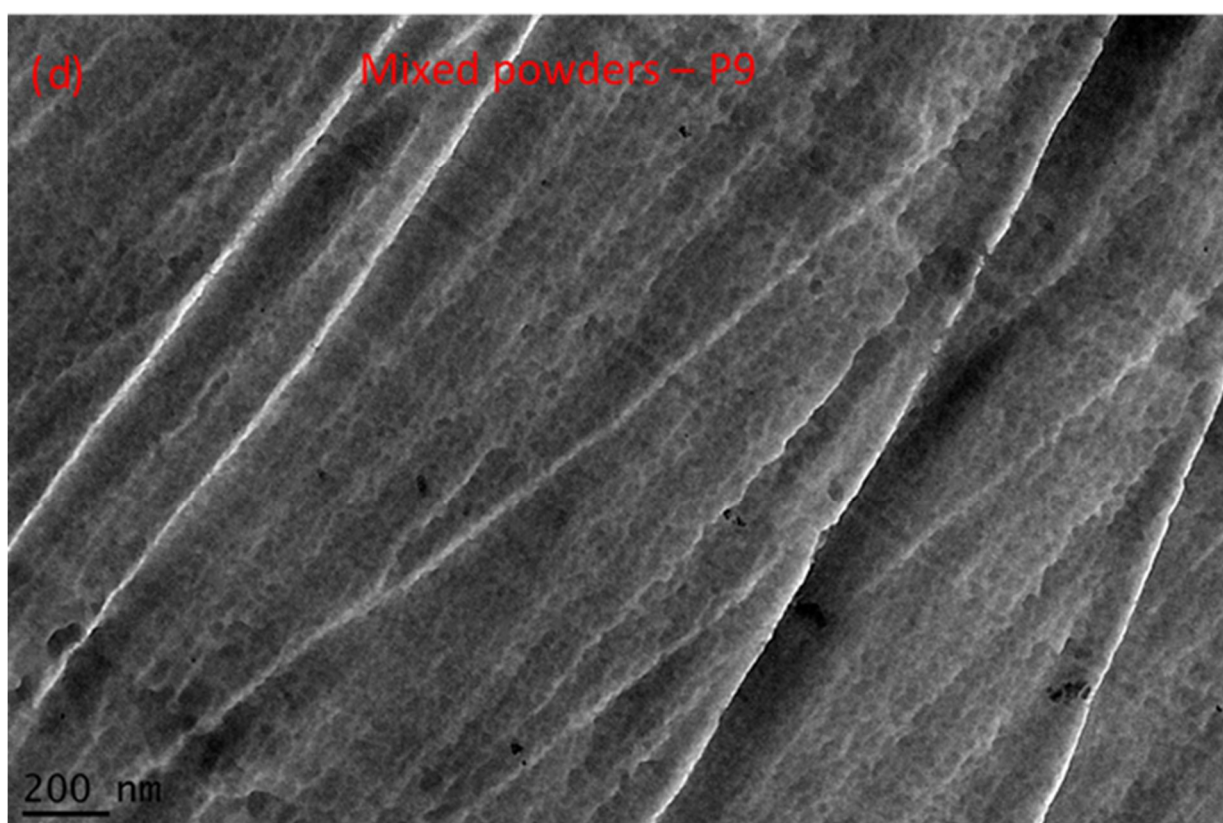

**Figure S.I.7.** TEM of composites processed from mixed powders: (a) and (b): P2; (c) and (d) P9

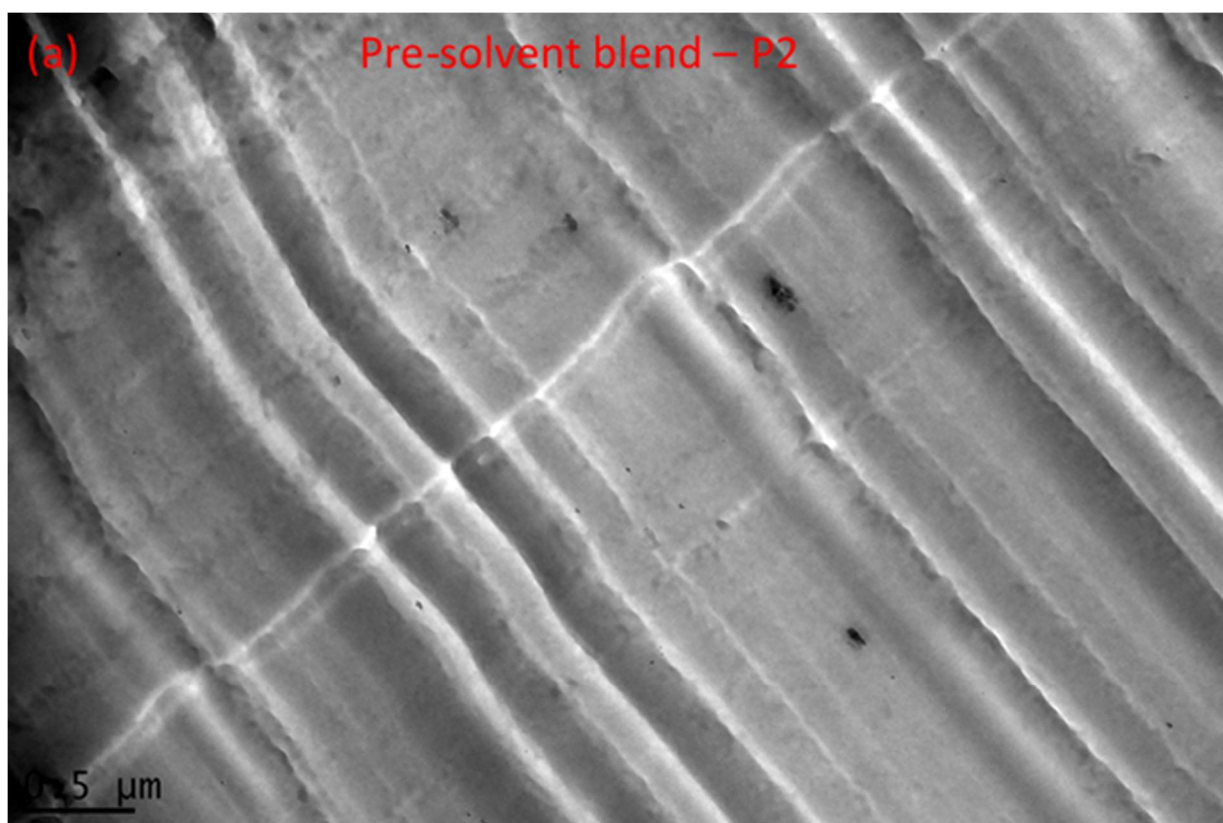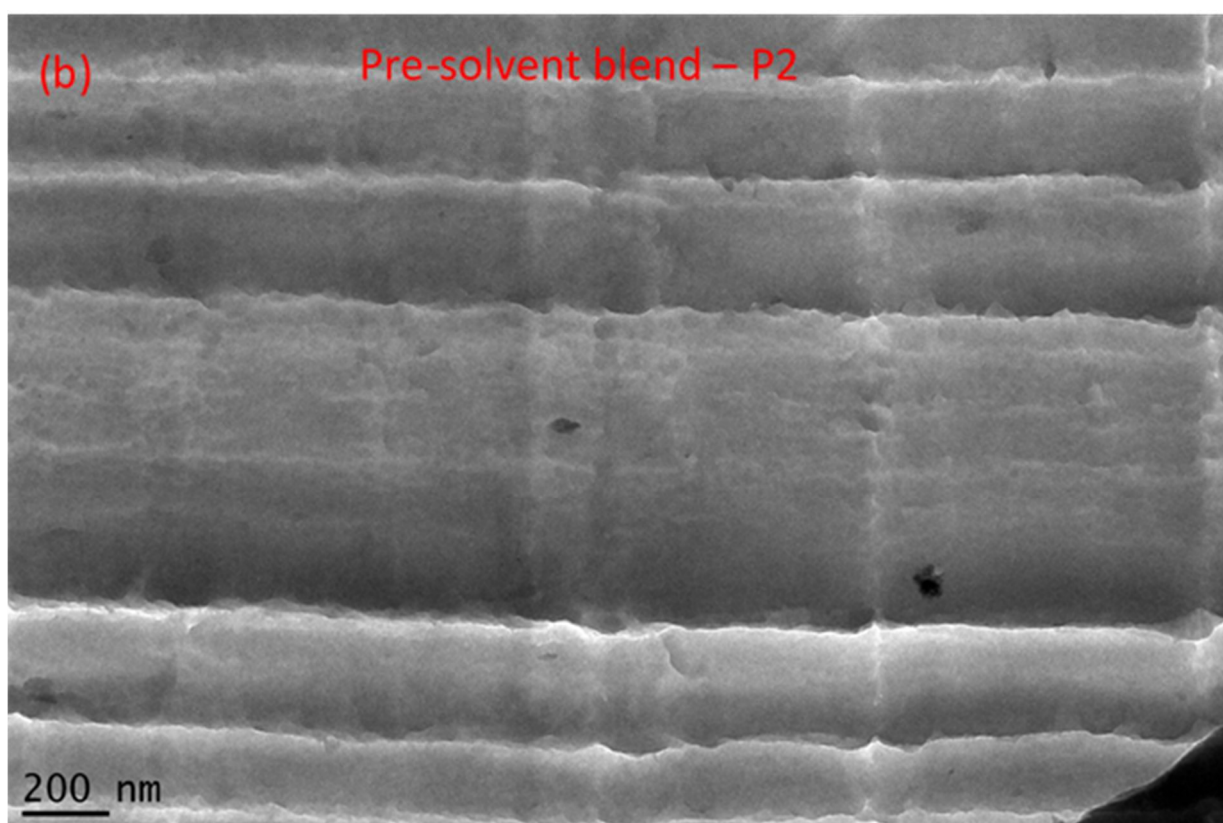



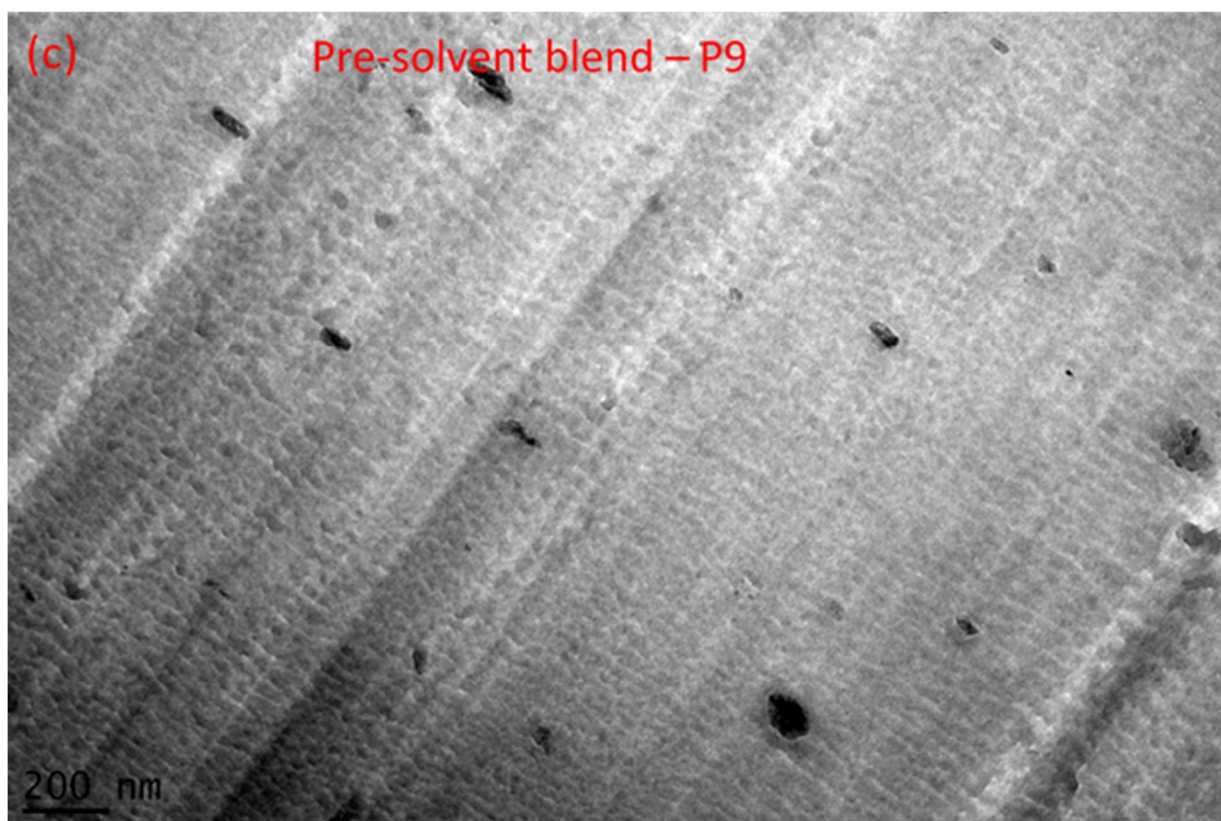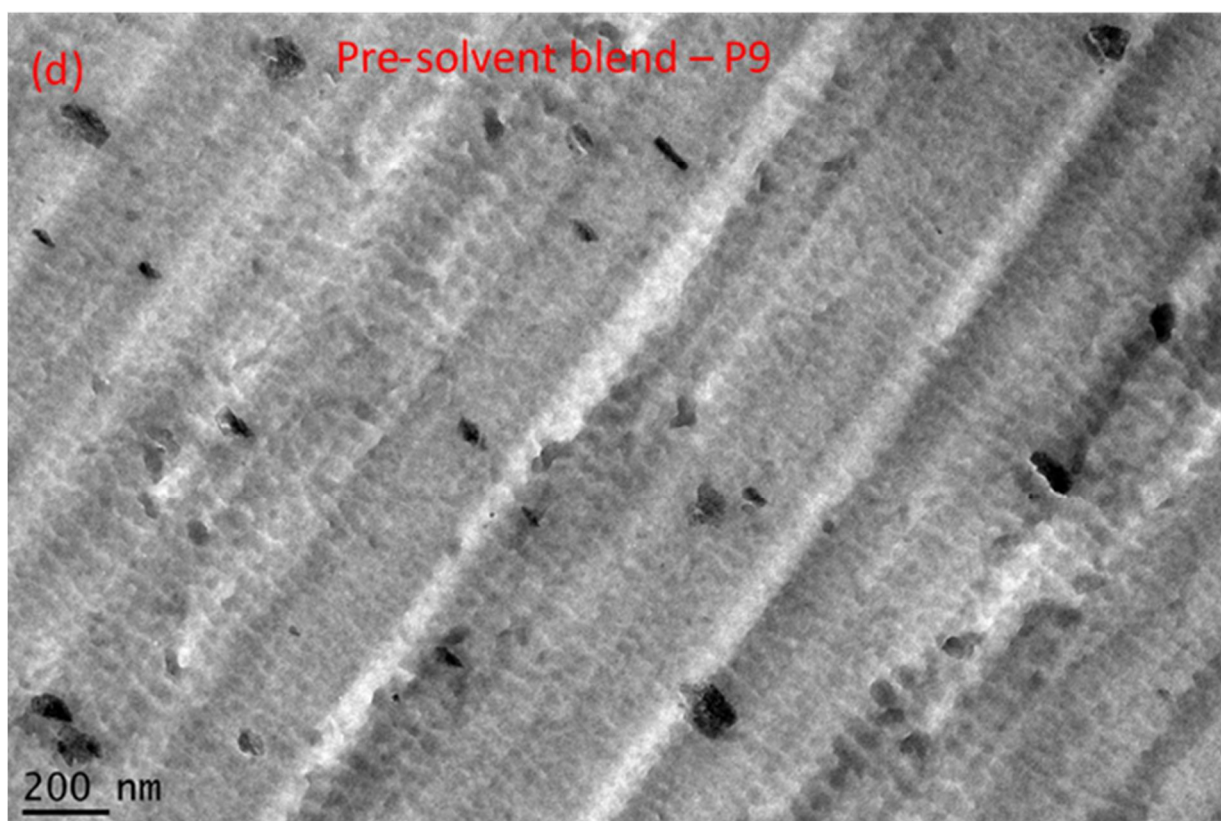

**Figure S.I.8.** TEM of composites processed from solvent-blend: (a) and (b): P2; (c) and (d) P9

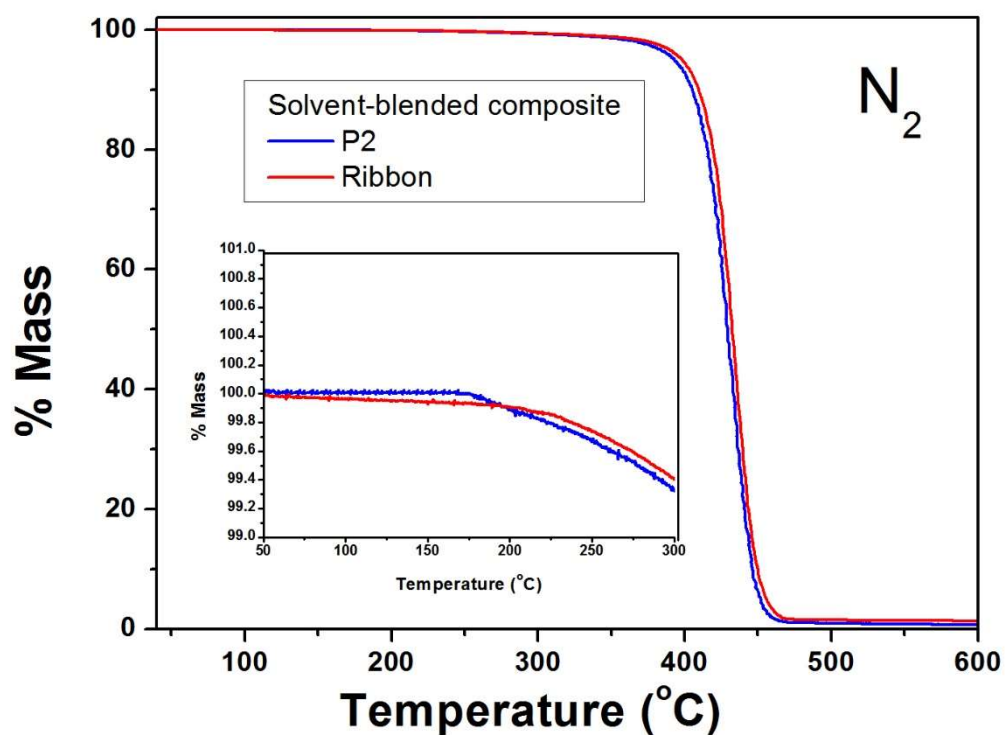

**Figure S.I.9.** Thermogravimetry measurements of pre-solvent-blended composites collected from P2 and ribbon.

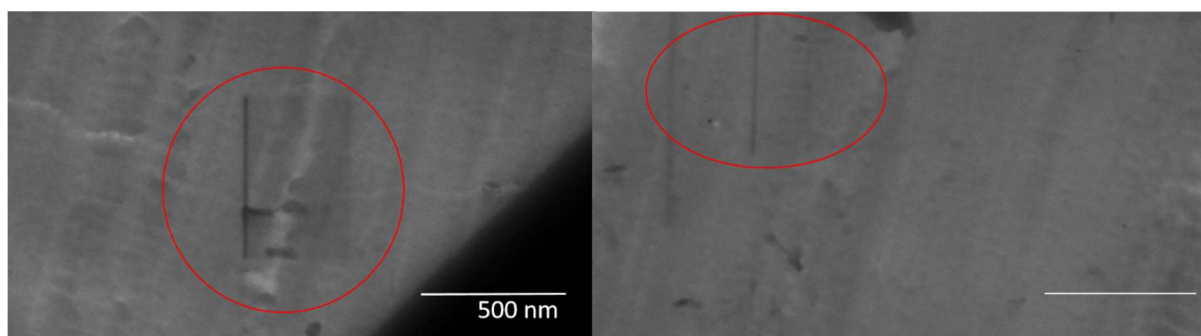

**Figure S.I.10.** STEM images showing contamination on surface of solvent processed samples caused by the electron beam highlighted by the red circles. The scale bars are both 500 nm.

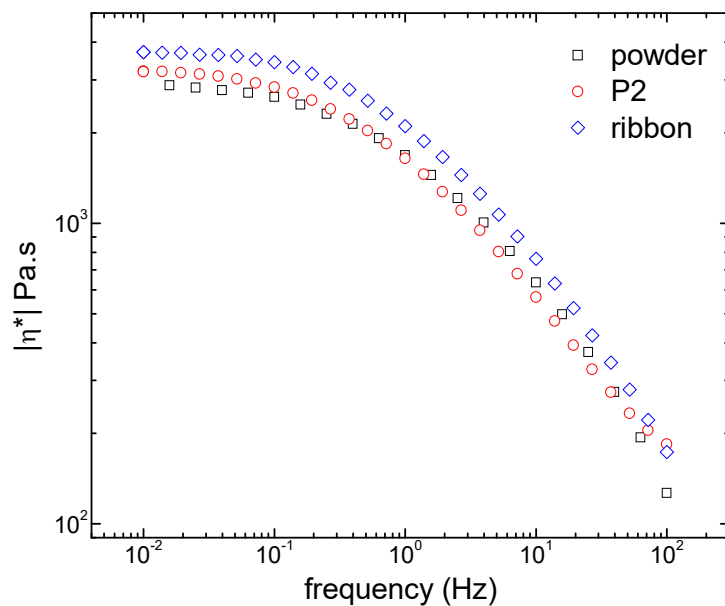

**Figure S.I.11.** Mechanical spectra measured at 200 °C of PS sample fed into the extrusion line (powder, squares), of PS sample collected at P2 along the extruder (P2, circles) and PS ribbon (ribbon, diamond).

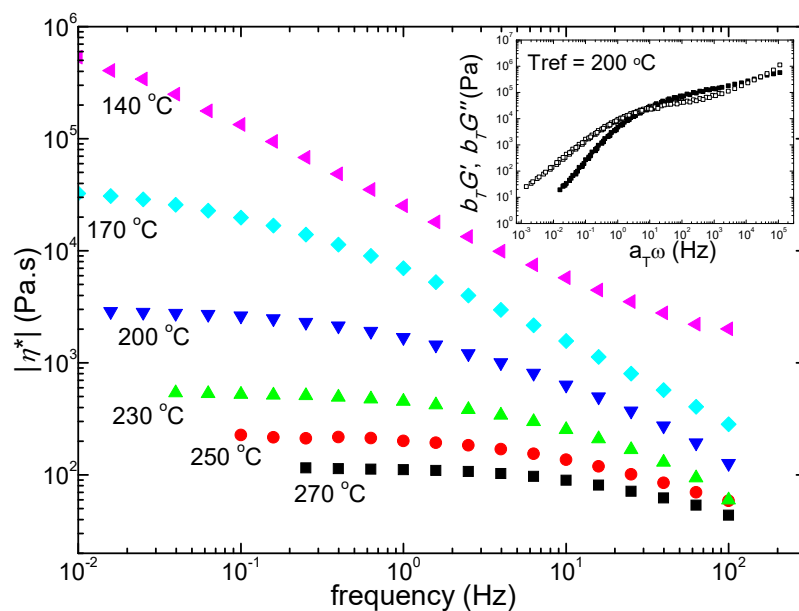

**Figure S.I.12.** Construction of the master curve of the PS matrix. Mechanical spectra measured at different temperatures indicated in the Figure are overlayed by shifting horizontally the curves with a factor  $a_T$  and vertically with a factor  $b_T$  to build the master curve plotted in the inset.

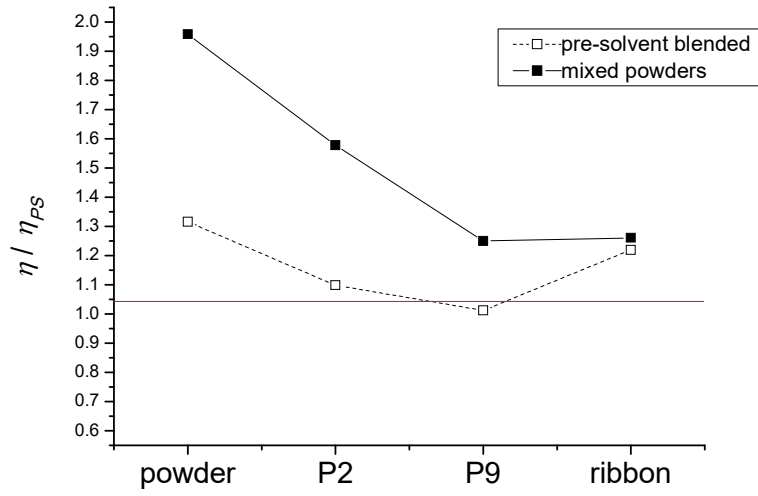

**Figure S.I.13.** Evolution along the extruder of the ratio between the zero shear viscosity of the composite  $\eta$  and the zero shear viscosity of the PS matrix  $\eta_{PS}$  for the two feeding formulations. The red line indicates the viscosity ratio predicted by the Einstein equation for a suspension of hard spheres in a Newtonian matrix.

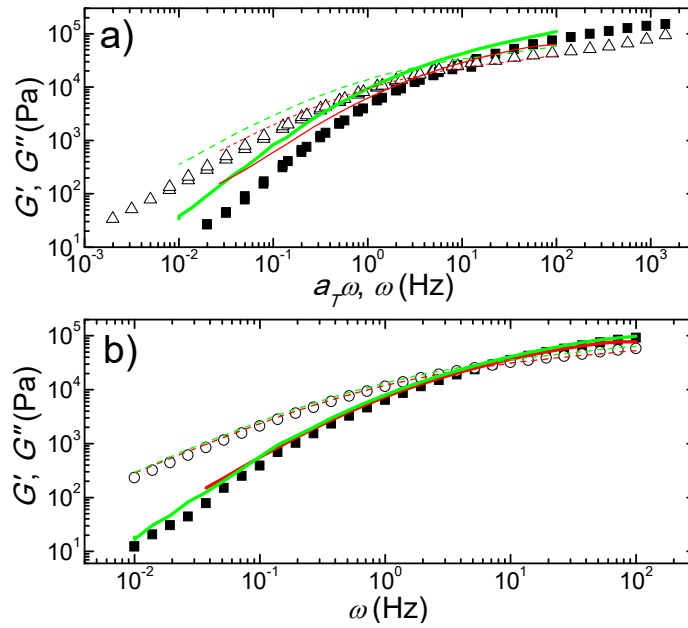

**Figure S.I.14.** Mechanical spectra of feeding powders (a) and of the corresponding extruded ribbons (b). Filled and empty symbols correspond to  $G'$  and  $G''$  of the PS matrix respectively, whereas full lines and dashed lines correspond to  $G'$  and  $G''$  respectively of the mixed powder samples (green) and the pre-solvent blended samples (red).
